# Supplementary material for: A human endogenous retrovirus-derived gene that can contribute to oncogenesis by activating the ERK pathway and inducing migration and invasion
Source: PubMed Central journal article supplement (PMC5501692; doi:10.1371/journal.ppat.1006451), 2017-06-26

Supporting Figure 2:

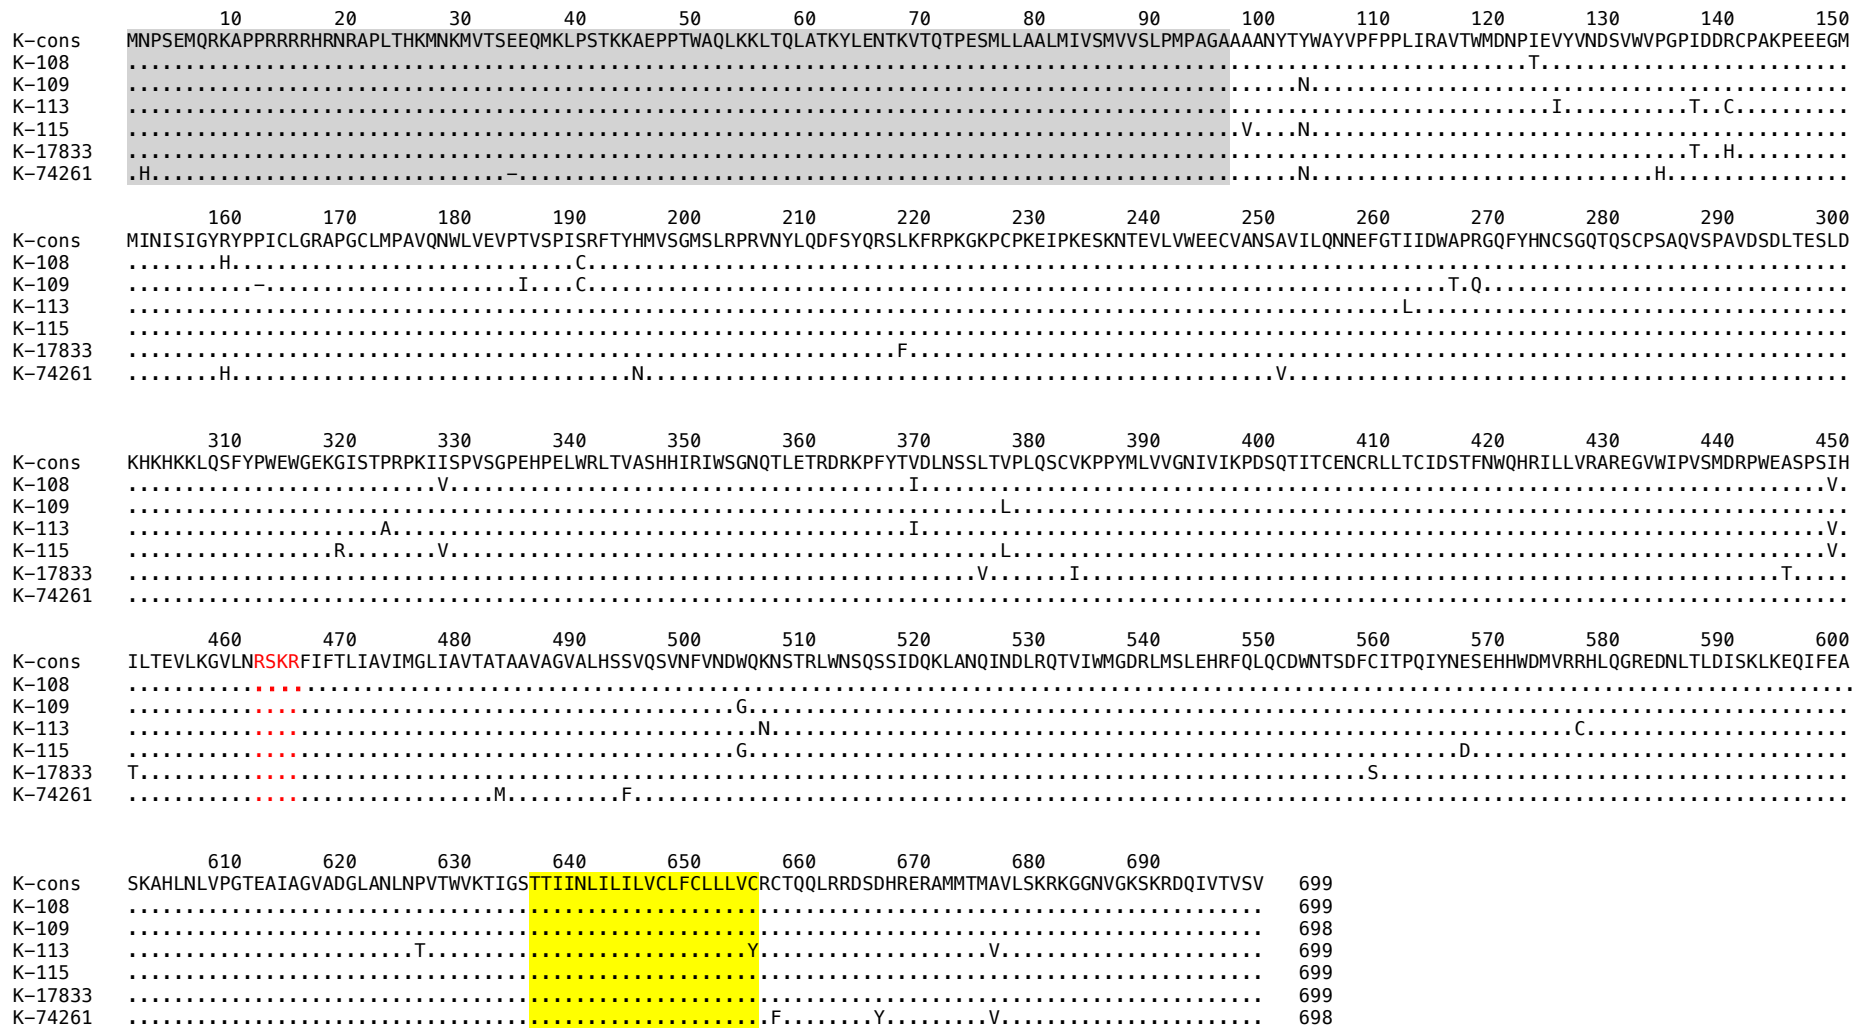

Supplement: ppat.1006451.s002.pdf [file ppat.1006451.s002.pdf]
